# Supplementary material for: Temozolomide-induced increase of tumorigenicity can be diminished by targeting of mitochondria in in vitro models of patient individual glioblastoma
Source: PubMed Central journal article supplement (PMC5774812; doi:10.1371/journal.pone.0191511), 2018-01-19
Supplement: pone.0191511.s001.pdf [file pone.0191511.s001.pdf]

| Cell line | Diagnosis | Patient age/gender | MGMT-Promotor Methylation |              |
|-----------|-----------|--------------------|---------------------------|--------------|
|           |           |                    | untreated                 | treated      |
| HROG06    | GBM       | 53/M               | unmethylated              | unmethylated |
| HROG10    | GBM       | 74/M               | unmethylated              | unmethylated |
| HROG36    | GBM       | 80/F               | unmethylated              | unmethylated |
| HROG38    | GBM       | 49/F               | unmethylated              | unmethylated |
